# Supplementary material for: Vapor-phase conversion of aqueous 3-hydroxybutyric acid and crotonic acid to propylene over solid acid catalysts
Source: Royal Society of Chemistry journal article supplement (doi:10.1039/d1cy01152a), 2021-01-01
Supplement: d1cy01152a1.pdf [file d1cy01152a1.pdf]

## Supporting Information

### **Vapor-phase conversion of aqueous 3-hydroxybutyric acid and crotonic acid to propylene over solid acid catalysts**

Shijie Leow, Andrew J. Koehler, Lauren E. Cronmiller, Xiangchen Huo, Gabriella D. Lahti, Yalin Li, Glenn R. Hafenstine, Derek R. Vardon,\* Timothy J. Strathmann\*

## Table of contents

|                                                   |   |
|---------------------------------------------------|---|
| S1. Reactor photograph and general schematic..... | 3 |
| S2. Reaction temperature effect.....              | 4 |
| S3. Catalyst-free control.....                    | 4 |
| S4. Additional catalyst screening.....            | 5 |
| S5. Crotonic acid over NbP.....                   | 6 |
| S6. Partial conversion with crotonic acid.....    | 7 |
| S7. Long term time-on-stream experiment.....      | 8 |
| S8. Steam treated catalysts.....                  | 9 |

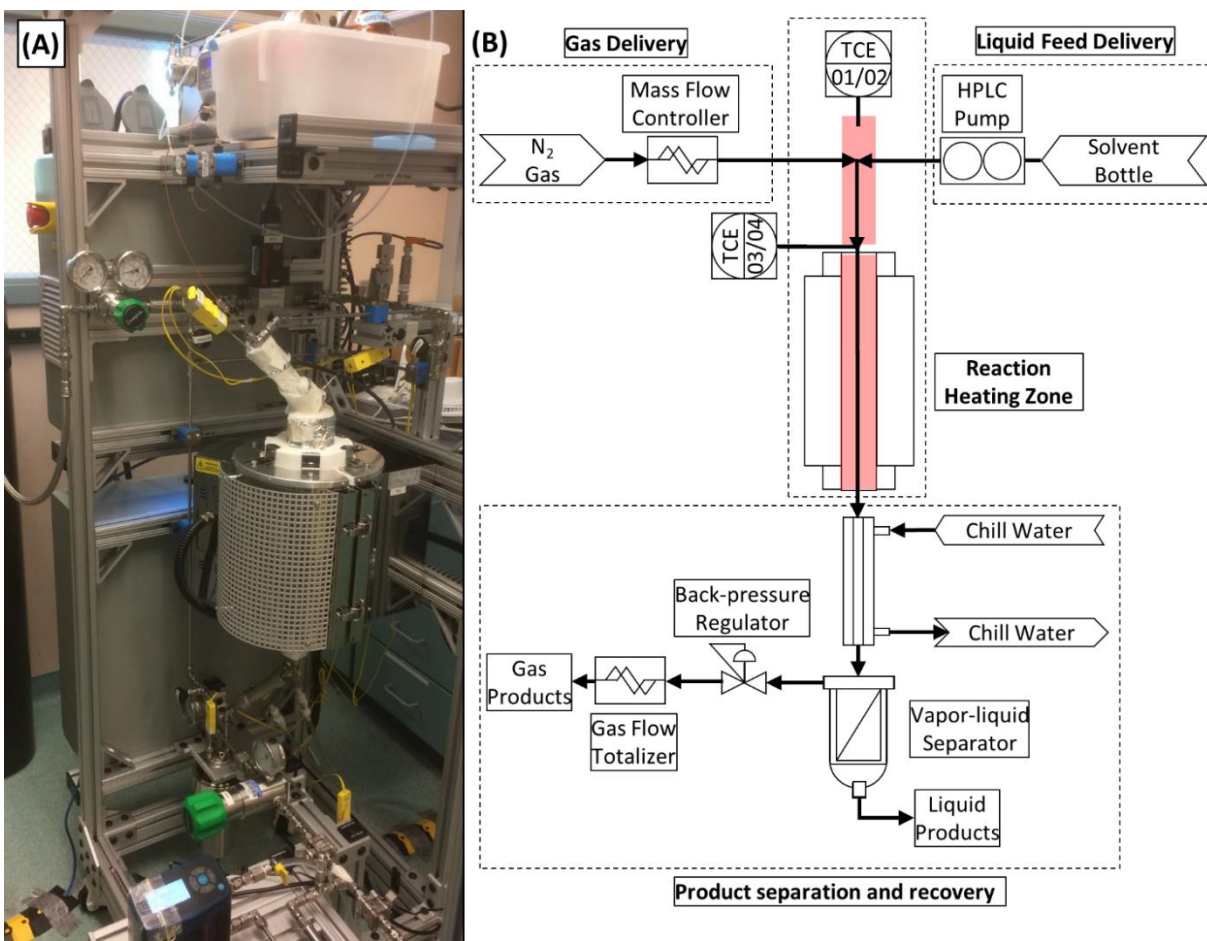

**Figure S1.** Fixed bed catalytic reactor used for performing experiments. (A) photograph and (B) general schematic.

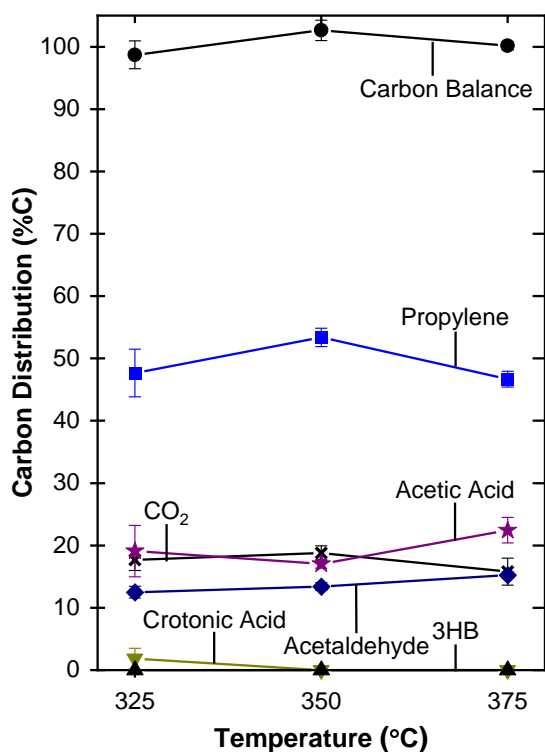

**Figure S2.** Effect of varying reactor bed temperature on carbon selectivity during vapor-phase conversion of 3HB over SIAL 3113 (as %C of inflow 3HB feed). Reaction conditions: WHSV of 3HB of  $0.1 \text{ h}^{-1}$ , 40 sccm  $\text{N}_2$  at 55 psig (gaseous products sampled at atmospheric pressure), 4 h time-on-stream. Data points with error bars show the mean of duplicate reactions with min/max values.

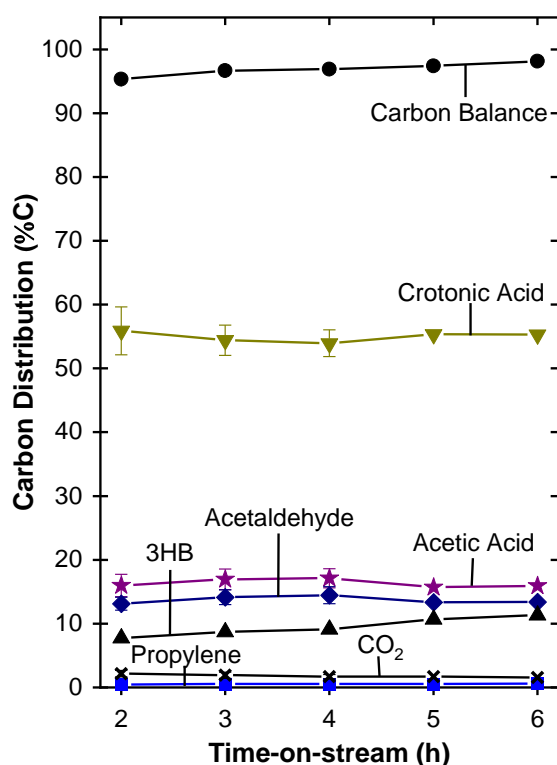

**Figure S3.** Carbon selectivity (as %C of inflow 3HB feed) results for 3HB “blank” reaction (no catalyst present) shown for the first 6 h time-on-stream. Reaction conditions: 350 °C, 0.3 mL/min of 2 wt% aqueous 3HB, 40 sccm  $\text{N}_2$  at 55 psig (gaseous products sampled at atmospheric pressure). Data points with error bars show the mean of duplicate reactions with min/max values where duplicates were performed (up to 4 h).

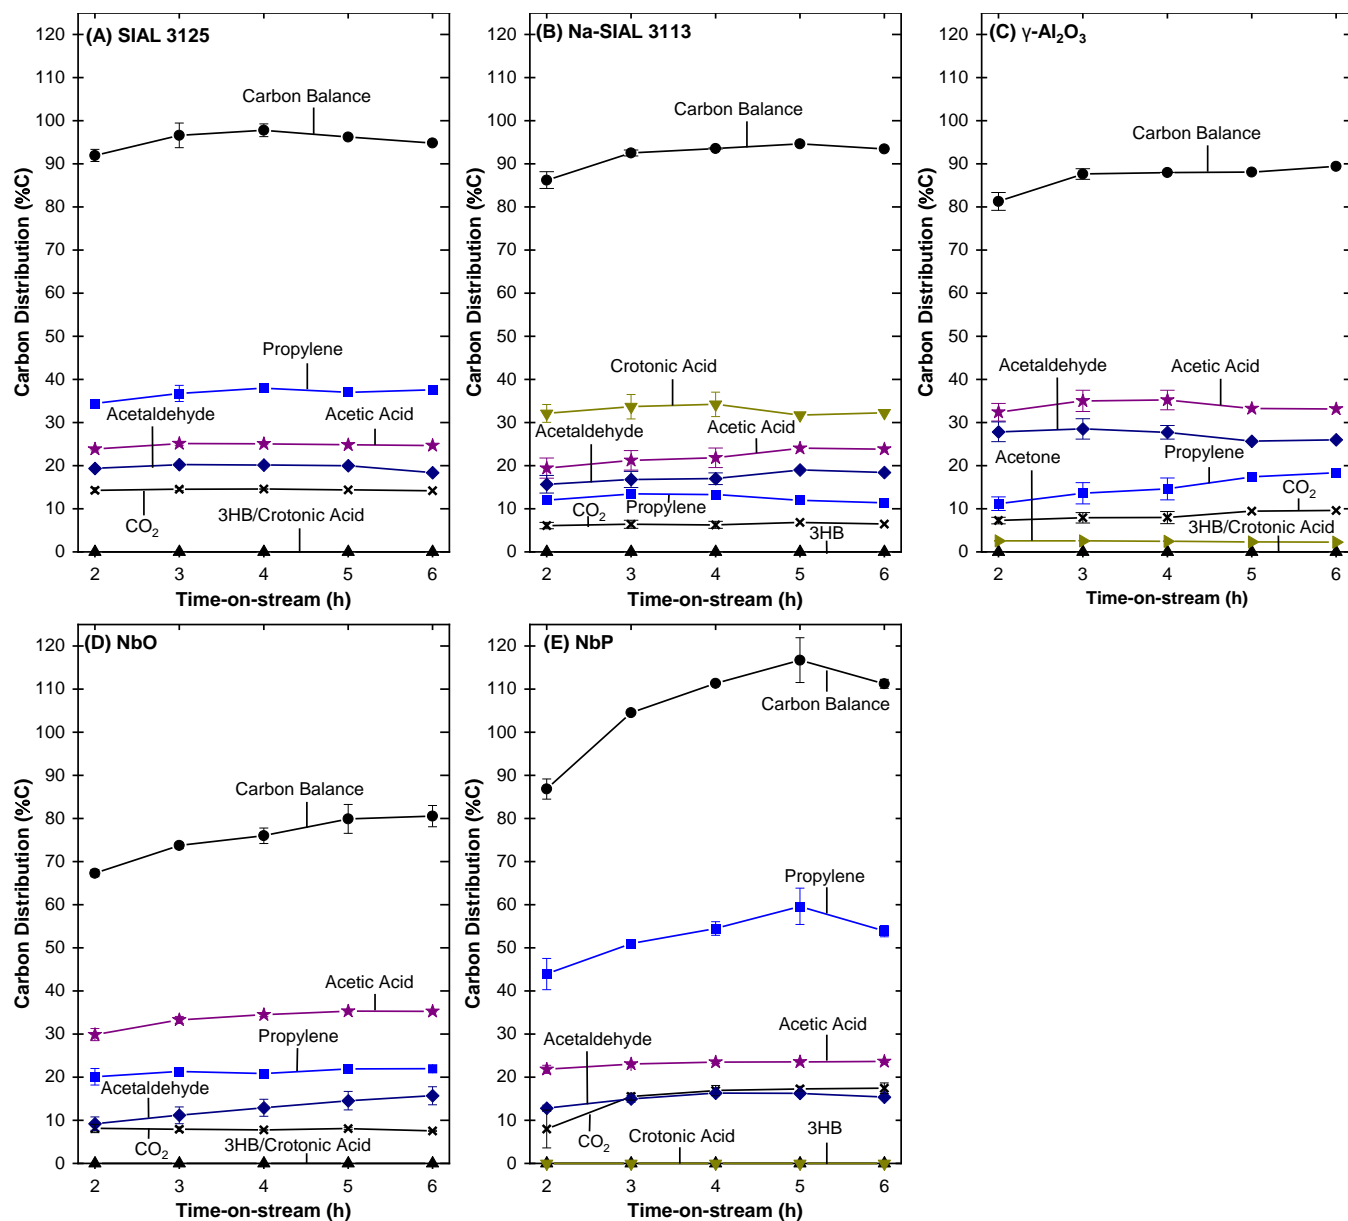

**Figure S4.** Detailed distribution of carbon products (as %C) during time-on-stream conversion of 3HB reaction over (A) SIAL 3125, (B) Na-SIAL 3113, (C)  $\gamma$ -Al<sub>2</sub>O<sub>3</sub>, (D) NbO, and (E) NbP corresponding to propylene yield data presented in **Figure 3a**. Reaction conditions: 350 °C, 0.1 h<sup>-1</sup> WHSV, 40 sccm N<sub>2</sub> at 55 psig (gaseous products sampled at atmospheric pressure). Data points with error bars show the mean of duplicate reactions with min/max values where duplicates were performed.

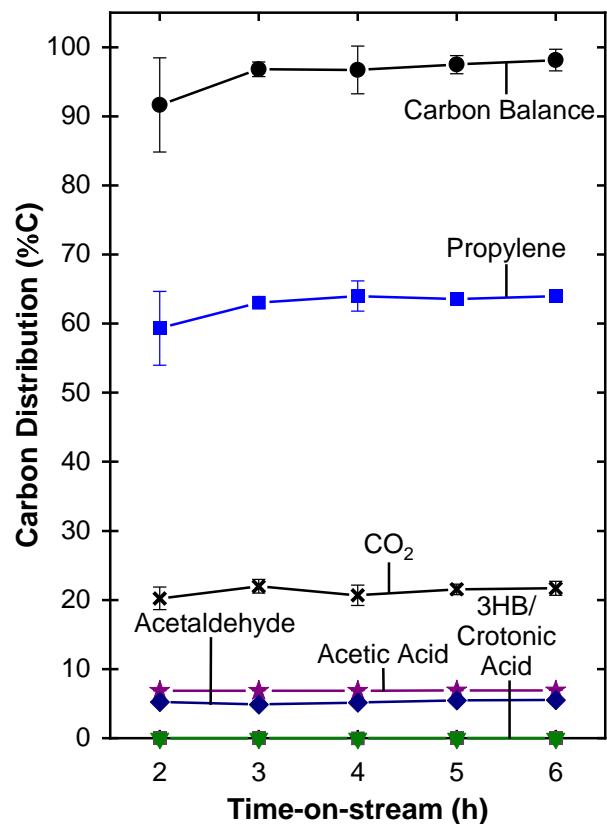

**Figure S5.** Distribution of carbon products (as %C of inflow crotonic acid feed) results for CA reaction over NbP. Reaction conditions: 350 °C, 0.1 h<sup>-1</sup> WHSV, 40 sccm N<sub>2</sub> at 55 psig (gaseous products sampled at atmospheric pressure). Data points with error bars show the mean of duplicate reactions with min/max values. Horizontal dotted line indicates theoretical maximum yield of propylene from conversion of CA.

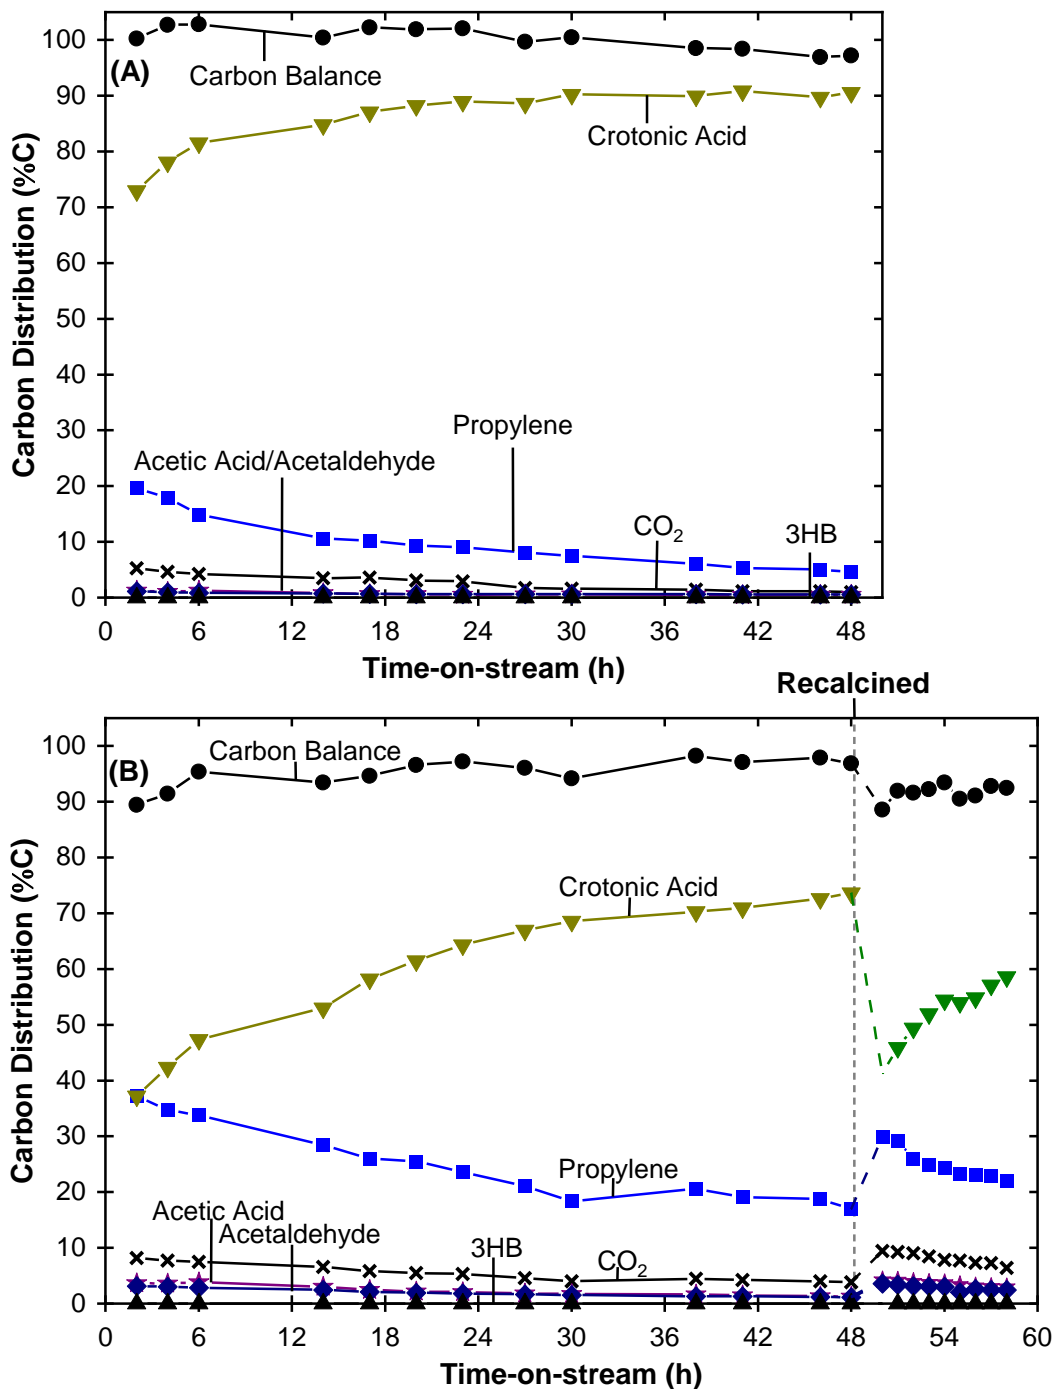

**Figure S6.** Detailed distribution of carbon products (as %C) during extended time-on-stream partial conversion of CA feeds for (A) SIAL 3113 and (B) NbP corresponding to the propylene yield data presented in **Figure 4**. Reaction conditions: 350 °C, 2.75 h<sup>-1</sup> WHSV, 40 sccm N<sub>2</sub> at 55 psig (gaseous products sampled at atmospheric pressure). Recalcination conditions: 500 °C for 3 h (200 °C·h<sup>-1</sup> heat rate).

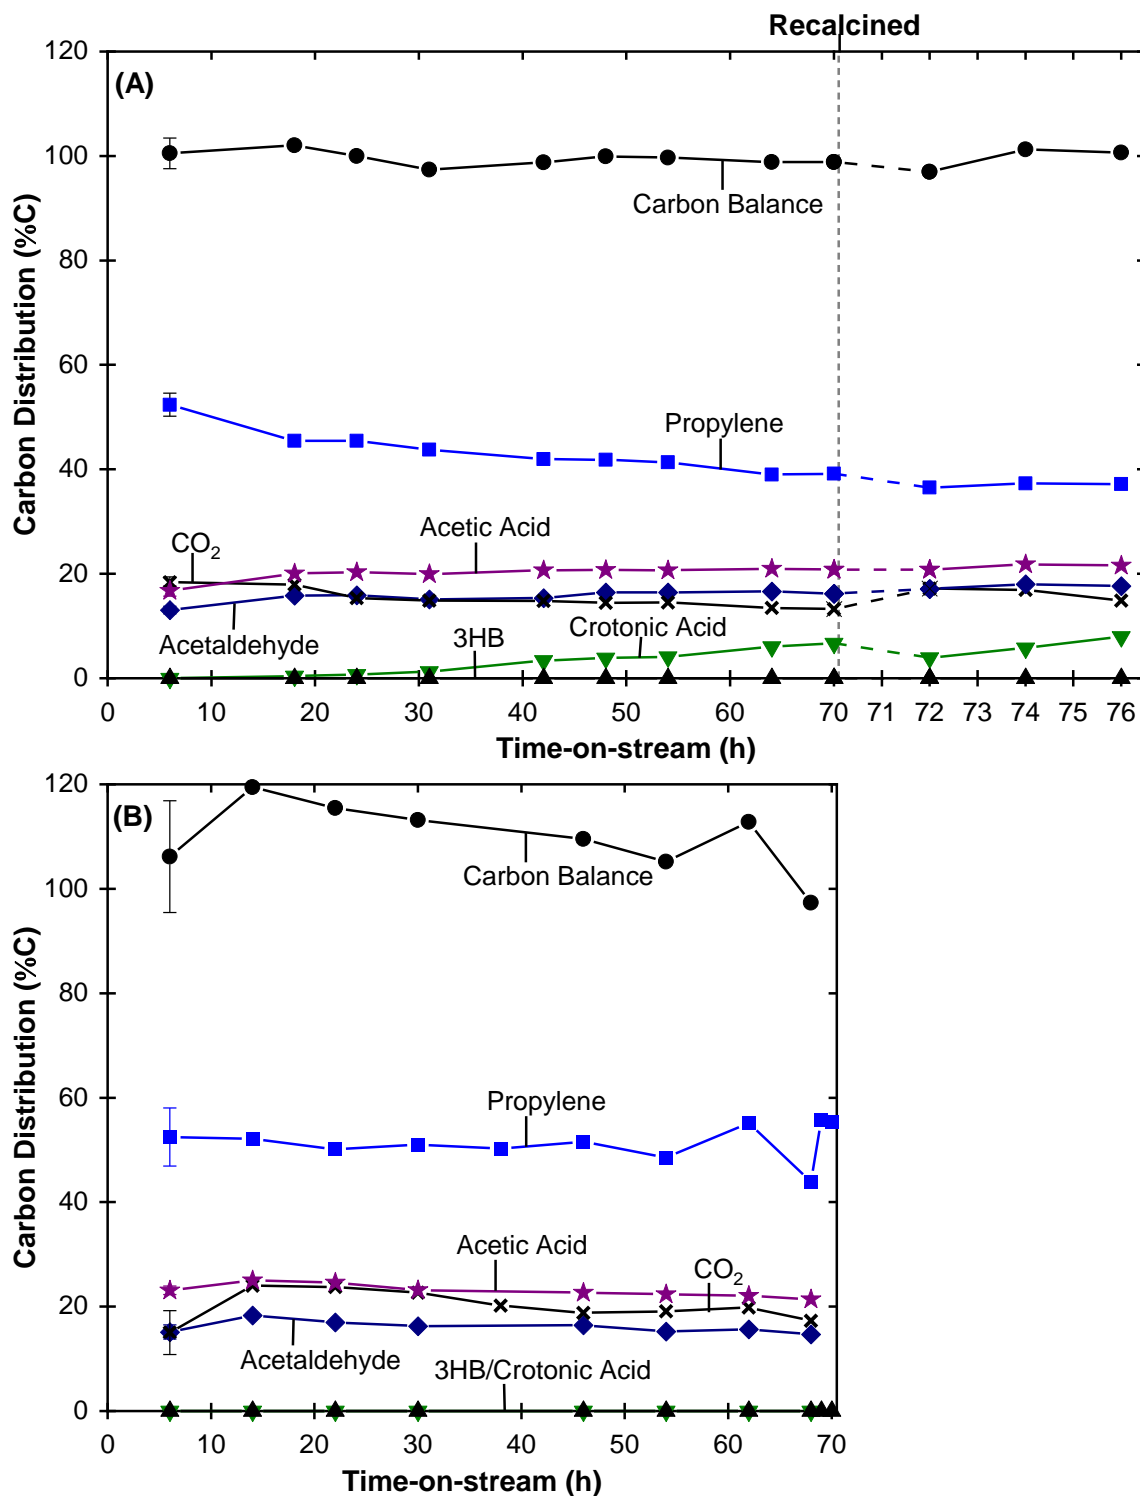

**Figure S7.** Detailed distribution of carbon products (as %C) during extended time-on-stream conversion of 3HB feeds for (A) SIAL 3113 and (B) NbP. SIAL 3113 subjected to recalcination at  $t = 70$  h before continuing time-on-stream conversion measurements. Reaction conditions:  $350\text{ }^{\circ}\text{C}$ ,  $0.1\text{ h}^{-1}$  WHSV, 40 sccm  $\text{N}_2$  at 55 psig (gaseous products sampled at atmospheric pressure). Recalcination conditions:  $550\text{ }^{\circ}\text{C}$  for 3 h ( $200\text{ }^{\circ}\text{C}\cdot\text{h}^{-1}$  heat rate).



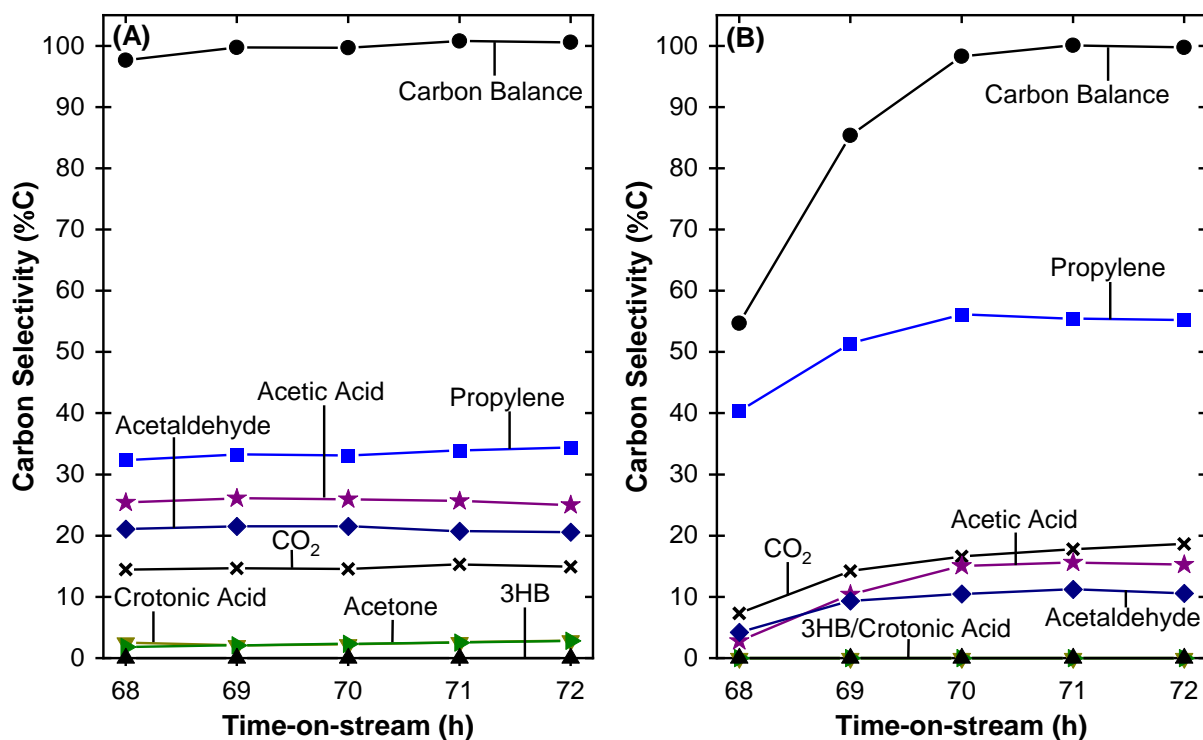

**Figure S8.** Carbon selectivity (as %C of inflow 3HB feed) of steam-treated SIAL 3113 (A) and NbP (B) for DYHD-DCBX of 3HB up to 6 h time-on-stream. Virgin catalysts were steam-treated for 66 h prior to starting 3HB feedstock (i.e., 68 h = 2 h time-on-stream of feedstock). Reaction conditions: 350 °C, 0.1 h<sup>-1</sup> WHSV, 40 sccm N<sub>2</sub> at 55 psig (gaseous products sampled at atmospheric pressure).
